1 **Movement and conformity interact to establish local behavioural traditions in**  
2 **animal populations**

3

4 Marius Somveille<sup>a,b\*</sup>, Josh A. Firth<sup>a,c</sup>, Lucy M. Aplin<sup>a,d</sup>, Damien R. Farine<sup>a,e,f</sup>, Ben C.  
5 Sheldon<sup>a</sup>, Robin N. Thompson<sup>g,h,i</sup>

6

7 <sup>a</sup> Edward Grey Institute, Department of Zoology, University of Oxford, South Parks Road, Oxford  
8 OX1 3PS, UK.

9 <sup>b</sup> Max Planck–Yale Center for Biodiversity Movement and Global Change, Yale University, 165  
10 Prospect Street, New Haven, CT 06520-8105, USA.

11 <sup>c</sup> Merton College, Merton Street, University of Oxford, Oxford, OX1 4JD

12 <sup>d</sup> Cognitive and Cultural Ecology Research Group, Max Planck Institute for Ornithology,  
13 Radolfzell, Germany.

14 <sup>e</sup> Department of Collective Behaviour, Max Planck Institute for Ornithology, Universitätsstrasse  
15 10, 78457 Konstanz, Germany.

16 <sup>f</sup> Chair of Biodiversity and Collective Behaviour, Department of Biology, University of Konstanz,  
17 Universitätsstrasse 10, 78457 Konstanz, Germany.

18 <sup>g</sup> Department of Zoology, University of Oxford, South Parks Road, Oxford OX1 3PS, UK.

19 <sup>h</sup> Mathematical Institute, University of Oxford, Radcliffe Observatory Quarter, Woodstock Road,  
20 Oxford OX2 6GG, UK.

21 <sup>i</sup> Christ Church, University of Oxford, St. Aldates, Oxford OX1 1DP, UK.

22

23 \* Corresponding author:

24 marius@somveille.com

## 25 **ABSTRACT**

26 The social transmission of information is critical to the emergence of animal culture.  
27 Two processes are predicted to play key roles in how socially-transmitted information  
28 spreads in animal populations: the movement of individuals across the landscape and  
29 conformist social learning. We develop a model that, for the first time, explicitly  
30 integrates these processes to investigate their impacts on the spread of behavioural  
31 preferences. Our results reveal a strong interplay between movement and conformity  
32 for determining whether local traditions establish across a landscape or whether a  
33 single preference dominates the whole population. The model is able to replicate a real-  
34 world cultural diffusion experiment in great tits *Parus major*, but also allows for a range  
35 of predictions for the emergence of animal culture under various initial conditions,  
36 habitat structure and strength of conformist bias to be made. Integrating social  
37 behaviour with ecological variation will be important for understanding the stability and  
38 diversity of culture in animals.

39

## 40 **INTRODUCTION**

41 The social transmission of information plays a central role in the lives of many animal  
42 species [1–3]. Social learning via observation of, or interaction with, other individuals is  
43 an efficient mechanism for acquiring information about the environment, leading to  
44 adaptive adjustments of behavioural responses [4,5]. The transmission of information  
45 through social networks can lead to the emergence of regional variations in behaviour  
46 that are stable through time (called local cultures or traditions; [6–10]). However, we  
47 still have little mechanistic understanding of the conditions under which local cultures  
48 can emerge. Understanding how ecological, cognitive and social processes determine the  
49 spread of information between individuals in wild populations is crucial if we want to  
50 discern the conditions under which information spreads and local traditions emerge.

51 A key ecological process that is likely to affect the spread of information is movement.  
52 First, movement of animals between discrete groups or sub-populations is expected to  
53 accelerate information spread across the whole population. Second, moving individuals  
54 can potentially import different behaviours into local groups or sub-population [11,12].  
55 How individuals move in a landscape, itself influenced by a range of factors such as  
56 habitat structure [13] and demography [14], is therefore likely to shape the dynamics of  
57 behaviours in natural populations.

58 One of the main socio-cognitive factors thought to affect the emergence of culture is  
59 conformity [15]. Conformist social learning is here defined as positive frequency  
60 copying, where individuals are disproportionately likely to adopt the most common  
61 behavioural trait [16]. Importantly, if individuals exhibit conformist learning, a single  
62 socially learnt behavioural preference might fix in a group, remain stable over time and  
63 be resistant to invasion by alternative variants, leading to the establishment and  
64 persistence of group-specific traditions. Several experimental studies have therefore  
65 suggested that conformity plays an important role in the establishment and stability of  
66 local traditions in various animal species [11,12,17,18]. However, the interplay between  
67 social learning biases such as conformity, and the ecological factors that determine the  
68 context in which such learning takes place, has rarely been studied.

69 Here, we investigate how movement and conformity interact to shape the spread of  
70 socially-transmitted information and the establishment of local traditions in animal  
71 populations. We first develop a theoretical spatially-explicit model of the spread of  
72 behavioural preference in which a puzzle (representing a novel foraging resource) can  
73 be solved in one of two ways. The population is assumed to be composed of several  
74 spatially distinct sub-populations, and each individual can either be unable to solve the  
75 puzzle, or solve the puzzle and prefer one of the two solutions. Individuals can learn the  
76 behaviour from each other, with a conformist bias guiding which preference they learn,  
77 and move between sub-populations. We then use this model to investigate the  
78 conditions under which local cultural traditions emerge. We consider simple scenarios  
79 in which there are only two or three sub-populations. In addition, we test the model's  
80 ability to replicate a real-world cultural diffusion experiment [11], in which alternative  
81 novel foraging techniques – consisting of opening a bi-directional door puzzle-box by  
82 sliding it either left or right to access food – were introduced in several wild sub-  
83 populations of great tits *Parus major*. The spread of these foraging behaviours in the  
84 population was monitored, revealing that the behaviour was socially transmitted with a  
85 significant conformist bias, and that local foraging traditions established within the  
86 population. As we show, our modelling approach can recreate the empirical results of  
87 the experiment conducted by Aplin et al. [11], and predict the conditions under which  
88 such local traditions are likely to establish and persist in the population.

89

90

## 91 **RESULTS**

### 92 *The baseline model*

93 Our model integrates the movement of individuals across the landscape and the social  
94 process of transmission of information between individuals, including a conformist bias.  
95 In the baseline version of the model, the spread of behavioural preferences for solutions  
96 to a puzzle (solutions  $s_1$  and  $s_2$ ) occurs in an environment with a metapopulation  
97 structure composed of two connected patches, each one hosting a sub-population (see  
98 details in Materials and Methods). These sub-populations are composed of naïve  
99 individuals (i.e. individuals who do not know how to perform the behaviour whose  
100 spread is being modelled) and knowledgeable individuals, or innovators (i.e. individuals  
101 who know how to perform one of the behaviours). At the start of each numerical  
102 solution of the model (hereafter, “simulation”), innovators are introduced in the system  
103 (initially only comprised of naïve individuals), with different behavioural preferences in  
104 each sub-population. The spread of behavioural preferences is then simulated for 150  
105 time-steps.

106 We found that the emergence of contrasting local traditions (i.e. the situation where, at  
107 the end of the simulation, one sub-population is dominated by individuals with one  
108 behavioural preference while the other sub-population is dominated by individuals with  
109 the alternative behavioural preference) strongly depends on the relationship between  
110 the strength of conformity and the rate of movement of individuals between patches,  
111 determined by parameters  $\lambda$  and  $m$  respectively (see details in Materials and Methods).  
112 When conformity was not included in the model (i.e.  $\lambda = 1$ ), the pattern that always  
113 emerged regardless of other parameter values (except when the difference in size  
114 between the two sub-populations was very large) was a mixture of behavioural  
115 preferences in both patches (Figs 1 and S1). When conformity was strong relative to the  
116 movement rate, local traditions established and remained stable (Fig 1). When  
117 conformity was weak relative to the movement rate, one of the two behavioural  
118 preferences dominated the whole system (Fig 1). In the latter case, which preference  
119 dominated depended on the relative sizes of the sub-populations. When the size of the  
120 sub-population (i.e. the number of naïve individuals in the patch) in which an innovator  
121 with a given behavioural preference was initially introduced was larger than the size of  
122 the other sub-population, then that preference came to dominate at the end of the



123 simulation (Fig S1). When the two sub-populations had exactly the same size, which  
 124 behavioural preference dominated at the end of the simulation appeared to be random  
 125 and very sensitive to the precise parameter values (Fig S1). Finally, the main effect of the  
 126 learning rate was to determine how much stronger/weaker conformity must be relative  
 127 to the magnitude of the movement rate to obtain these patterns: the lower the learning  
 128 rate, the stronger conformity had to be relative to the movement rate to see local  
 129 traditions establish and stabilise (Figs 1 and S1).

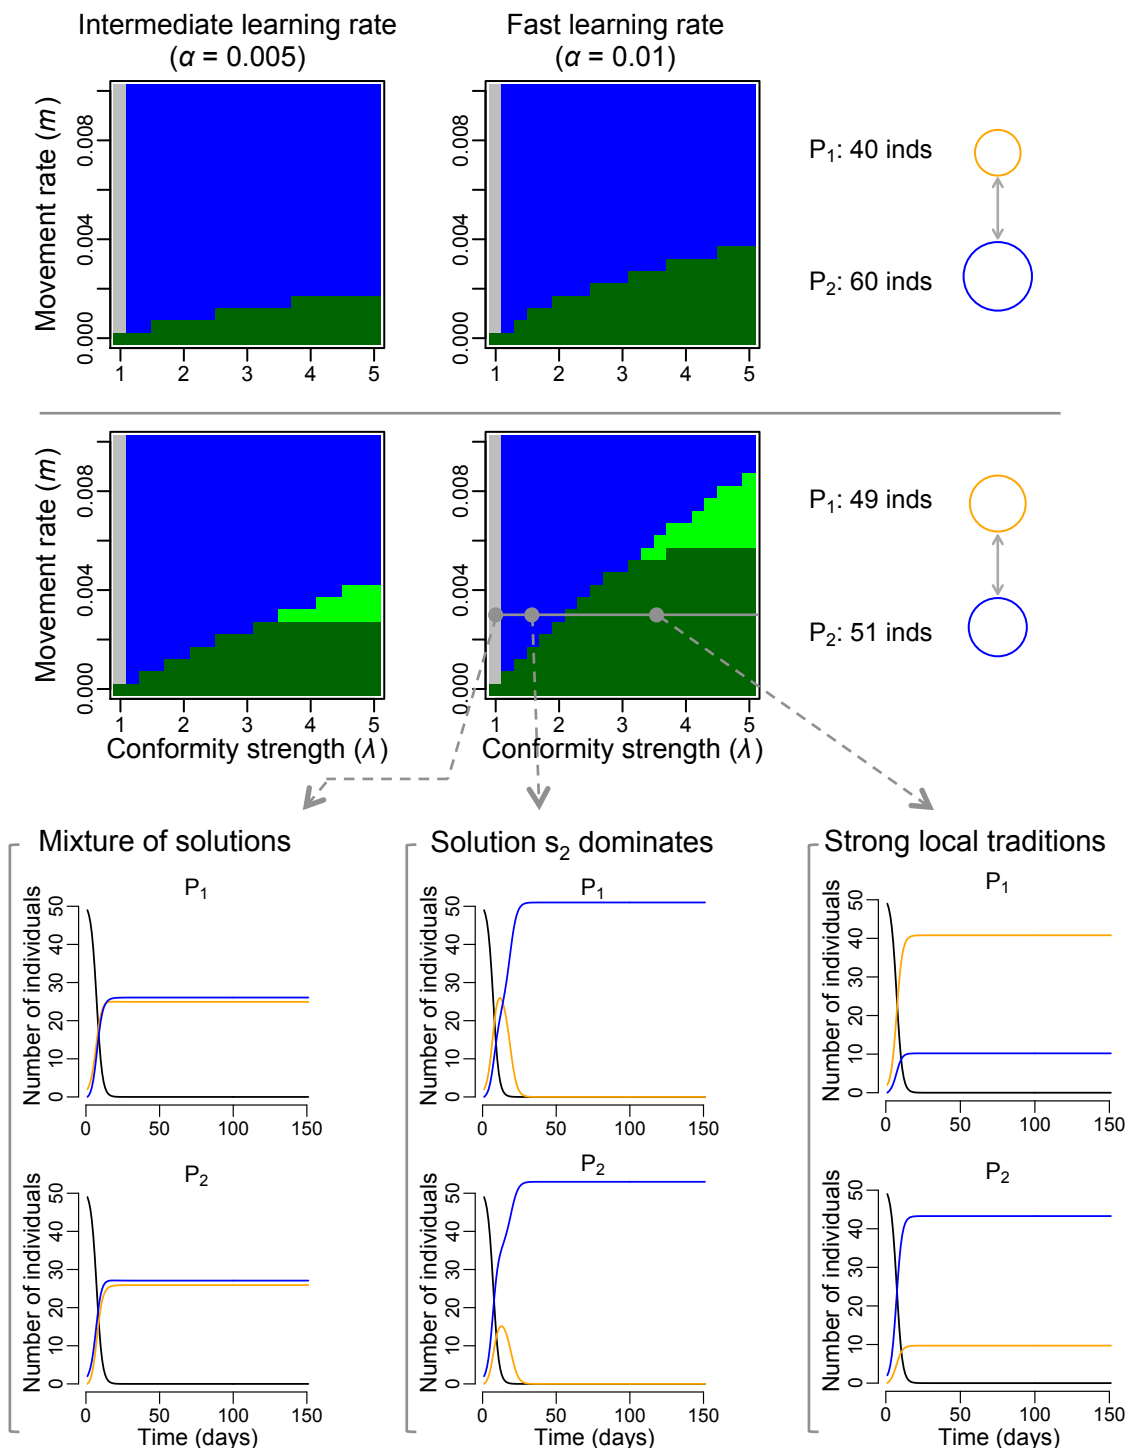

130

131 **Fig 1. Local traditions emerge when conformity is strong relative to the movement**  
132 **rate.** This panel shows the model outputs for the baseline model with two patches. At  
133 the start of every simulation, patch 1 contained two innovators using solution  $s_1$  and  
134 contained  $P_1$  naïve individuals, while patch 2 contained two innovators using solution  $s_2$   
135 and contained  $P_2$  naïve individuals. Each pixel in the phase diagrams corresponds to a  
136 simulation run with the corresponding parameter values, and the colour of the pixel  
137 indicates the emerging pattern after 150 days: grey = mixture of solutions in every  
138 patch, blue = solution  $s_2$  dominated the whole system, light green = weak local  
139 traditions, dark green = strong local traditions. The two columns of phase diagrams  
140 represent different learning rates: intermediate ( $\alpha = 0.005$ ) and fast ( $\alpha = 0.01$ ). The  
141 two rows of phase diagrams represent a different configuration of patch sizes, reflecting  
142 the differences in number of naïve individuals at the start of the simulation ( $U_0$ )  
143 occurring in each patch. Three examples of the evolution of the number of naïve  
144 individuals (black curve) and number of solvers using solution  $s_1$  (orange curve) and  
145 solution  $s_2$  (blue curve) in each patch, are shown for fixed movement rate ( $m = 0.003$ ),  
146 learning rate ( $\alpha = 0.01$ ) and patch sizes configuration, but with varying conformity  
147 strength. When no conformity bias was included ( $\lambda = 1$ ), patches contained a mixture of  
148 solutions; when conformity was relatively weak ( $\lambda = 1.5$ ), solution  $s_2$  (that seeded in the  
149 larger population) ended up dominating in both patches; and when conformity as  
150 relatively strong ( $\lambda = 3.5$ ), local traditions emerged.

151

### 152 *Simple environmental setting*

153 To examine the role of space in the spread of behavioural preferences, we extended the  
154 baseline model to a simple environmental setting with three spatially distinct patches,  
155 thereby effectively adding an extra patch containing no innovators at the start of the  
156 simulation (see Materials and Methods for details). Once again, when conformity was  
157 not included in the model ( $\lambda = 1$ ), the pattern that always emerged regardless of other  
158 parameter values was a mixture of behavioural preferences in all patches (Fig 2).  
159 Similarly to the baseline model, there was a strong relationship between movement rate  
160 and conformity strength; when conformity was strong relative to the movement rate,  
161 local traditions established and were stable (i.e. two sub-populations were dominated  
162 by individuals with one behavioural preference while the third sub-population was  
163 dominated by individuals with the alternative behavioural preference; Fig 2), and when  
164 conformity was weak relative to the movement rate, one of the two behavioural  
165 preferences ultimately dominated the entire system (Fig 2). In the latter case, which  
166 preference dominated depended on both the relative sizes of the sub-populations as  
167 well as the spatial configuration (i.e. the distances separating the sub-populations, which  
168 determines the relative movement rates of individuals between pairs of sub-

169 populations). If the size of the sub-population in which innovators with a given  
170 behavioural preference were initially introduced was larger than the size of the sub-  
171 population in which innovators with the alternative behavioural preference were  
172 introduced, and all sub-populations were equidistant, then the former preference was  
173 predominant at the end of the simulation (Fig S2). Also, increasing the distance  
174 separating a sub-population in which innovators with a given behavioural preference  
175 were initially introduced from the two other sub-populations (i.e. creating unequal  
176 movement rates between patches) resulted in this preference not being able to  
177 dominate the system at the end of the simulation (Fig S2).

178 Increasing the distance between patches also affected how much stronger/weaker  
179 conformity must be in comparison to the movement rate to generate the emerging  
180 patterns: the smaller the distance, the stronger conformity had to be relative to the  
181 movement rate for local traditions to establish and stabilise (Figs 2 and S2). When both  
182 patch size and spatial configuration acted in opposite directions, then either behavioural  
183 preference could ultimately dominate depending on the relationship between the  
184 strength of conformity and the magnitude of the movement rate. This may arise when  
185 the size of the sub-population in which innovators with a given behavioural preference  
186 were initially introduced was larger than the size of the sub-population in which  
187 innovators with the alternative behavioural preference were initially introduced, but  
188 this sub-population was also further away from the two others (see illustration in Fig 2).  
189 When conformity was relatively strong, but not so strong as to generate local traditions,  
190 then the behavioural preference that was not released in the larger, further away sub-  
191 population ended up dominating the system, otherwise the alternative preference  
192 dominated at the end of the simulation (Fig 2).

193 Unexpected results were also observed when both sub-populations in which innovators  
194 were introduced at the start of the simulation had the same size, which is larger than the  
195 third sub-population, with one of these two sub-populations being slightly further away  
196 from the two others. In contrast to what might have been expected based on other  
197 results, when conformity was very weak compared to the movement rate, then the  
198 behavioural preference of the innovator that was initially introduced in the most distant  
199 sub-population ended up being the most prevalent in the system (Fig S2, second plot of  
200 fourth row, in blue).

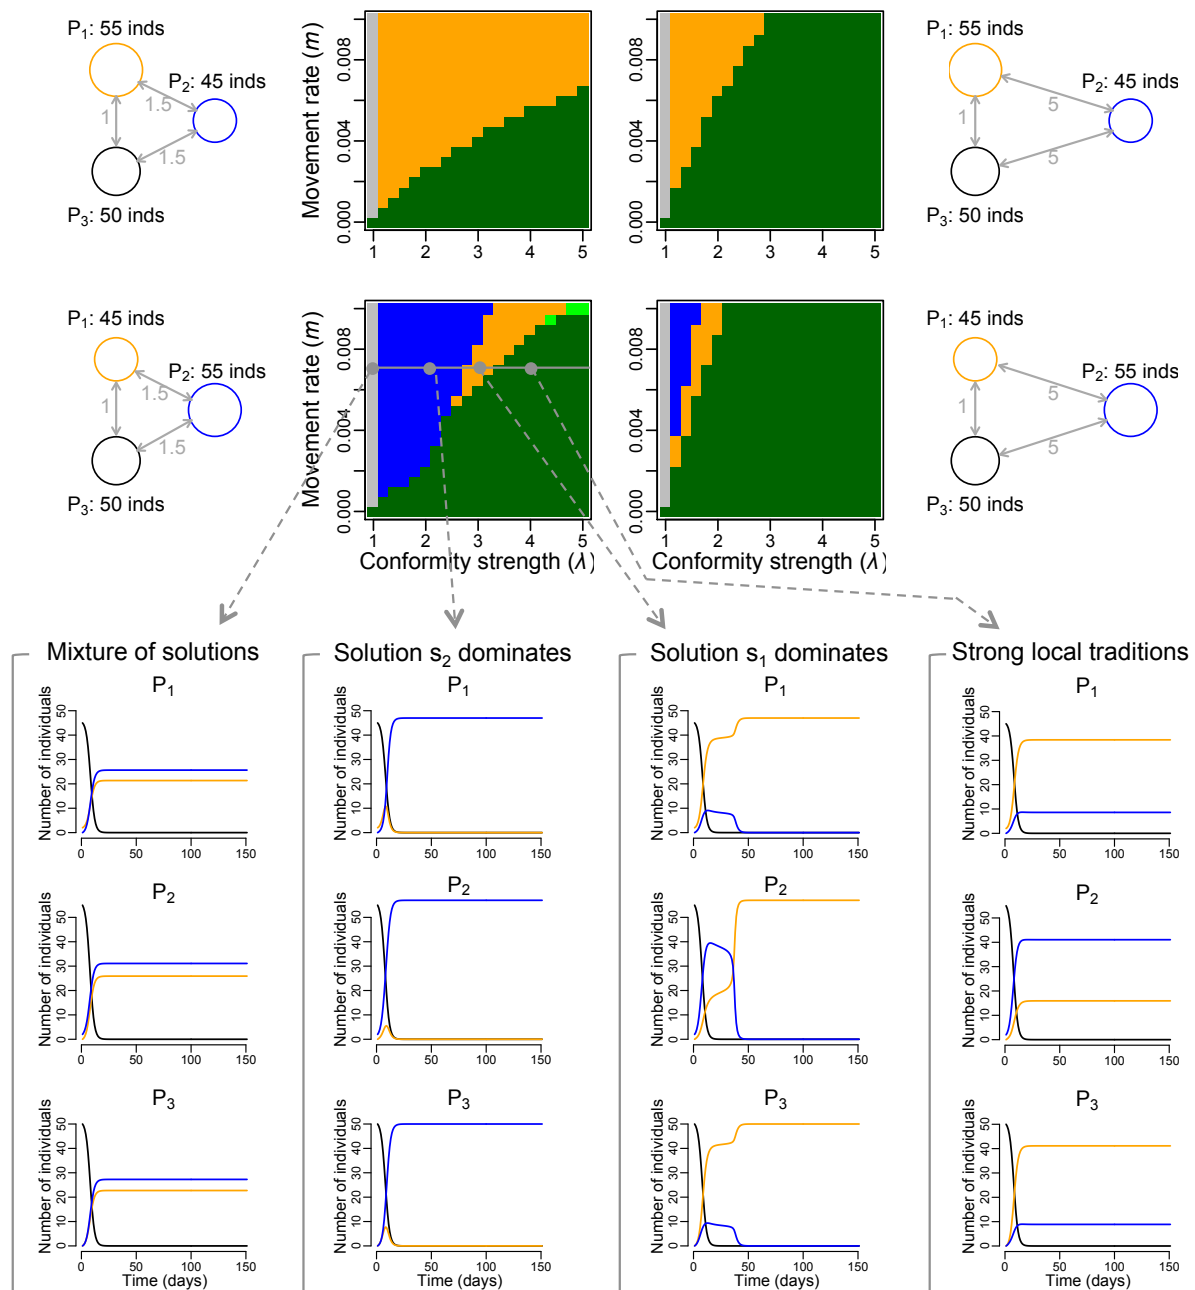

201

202

203

204

205

206

207

208

209

210

211

212

213

**Fig 2. Space has a complex effect on how conformity and movement lead to either the emergence of local traditions or the domination of a single solution.** This panel shows the model outputs in the three-patch case. At the start of every simulation, patch 1 contained two innovators using solution  $s_1$  and contained  $P_1$  naïve individuals, while patch 2 contained two innovators using solution  $s_2$  and contained  $P_2$  naïve individuals, and patch 3 contained only naïve individuals. Each pixel in the phase diagrams corresponds to a simulation run with the corresponding parameter values, and the colour of the pixel indicates the emerging pattern after 150 days: grey = mixture of solutions in every patch, blue = solution  $s_2$  dominated the whole system, orange = solution  $s_1$  dominated the whole system, light green = weak local traditions, dark green = strong local traditions. The two columns of phase diagrams represent different spatial configurations: a different distance between patch 2 and the other two patches (whose

214 distance separating them was set to 1), which results in different relative migration  
215 rates between pairs of patches. The two rows of phase diagrams represent a different  
216 configuration of patch sizes, reflecting differences in the number of naïve individuals  
217 (inds) at the start of the simulation ( $U_0$ ) that occurred in patches  $P_1$  and  $P_2$ . Four  
218 examples of the evolution of the number of naïve individuals (black curve) and number  
219 of solvers using solution  $s_1$  (orange curve) and solution  $s_2$  (blue curve) in each patch, are  
220 shown for fixed movement rate ( $m = 0.007$ ), and spatial and patch sizes configuration,  
221 but with varying conformity strength. When no conformity bias was included ( $\lambda = 1$ ),  
222 patches contained a mixture of solutions; when conformity was relatively weak ( $\lambda = 2$ ),  
223 solution  $s_2$  ended up dominating in every patch; when conformity was intermediate  
224 ( $\lambda = 3$ ), solution  $s_1$  ended up dominating in every patch; and when conformity was  
225 relatively strong ( $\lambda = 4$ ), local traditions emerged.

226

### 227 ***Realistic environmental setting***

228 To examine the role of habitat structure and the ecological process of movement in a  
229 realistic setting, we extended the baseline model to represent the great tit population of  
230 Wytham Woods, which has been the subject of a long-running study, and the site of a  
231 recent cultural diffusion experiment [11]. Running the model of spread of behavioural  
232 preference for this real-world animal population in its natural environment (see  
233 Materials and Methods for details) yielded results that were consistent with those for  
234 the baseline model and its extension to three patches. Three possible patterns emerged  
235 at the end of the simulation depending on parameter values: (1) a mixture of  
236 behavioural preferences in every sub-population when conformity was not included in  
237 the model (i.e.  $\lambda = 1$ ), (2) domination of one behavioural preference across the  
238 population when conformity was weak relative to the magnitude of the movement rate,  
239 and (3) the establishment of local traditions when conformity was strong relative to the  
240 magnitude of the movement rate (i.e. some sub-populations were dominated by  
241 individuals with one behavioural preference while the rest were dominated by  
242 individuals with the alternative preference, Fig 3). Increasing the degree of  
243 fragmentation of the landscape (by only allowing individuals to move through  
244 contiguous forest, as opposed to moving along straight direct paths between patches)  
245 affected how much stronger/weaker conformity must be compared to the magnitude of  
246 the movement rate to generate the different emerging patterns (Fig 3). Increasing the  
247 learning rate had a similar effect to increasing the degree of landscape fragmentation  
248 (Fig 3). That is, for local traditions to establish and stabilise, conformity had to be

249 stronger relative to movement rates when either the habitat was less fragmented or  
 250 when the learning rate was slower (Fig 3).

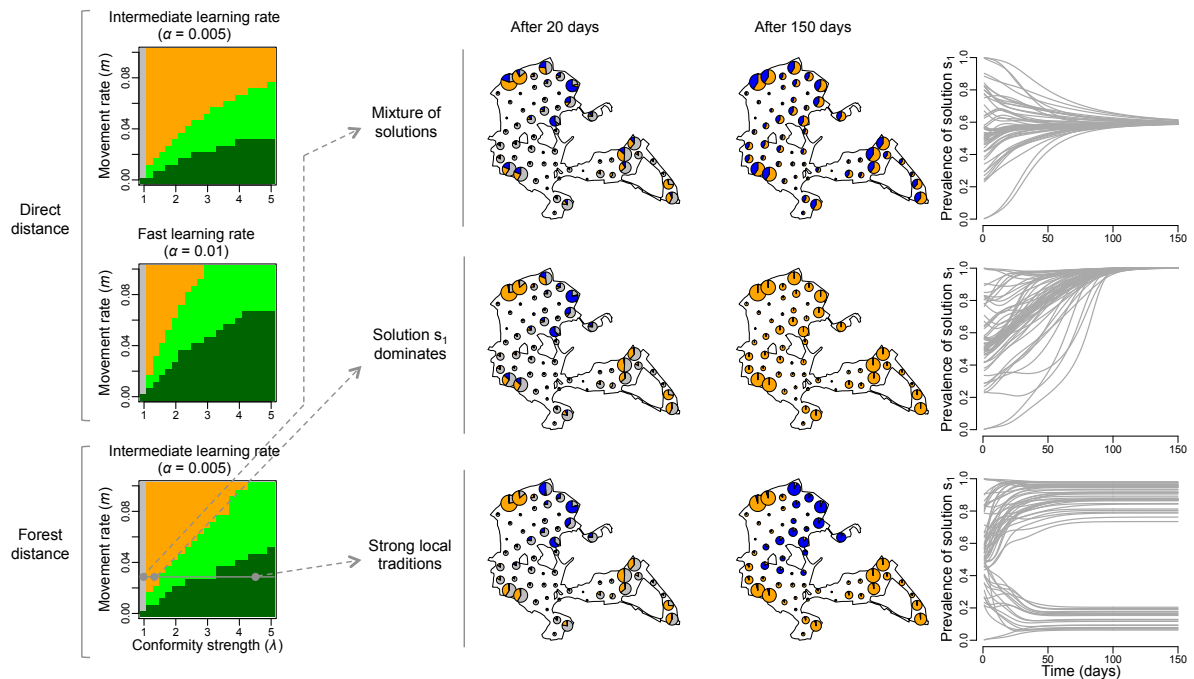

251

252 **Fig 3. Predictions for the spread of information in great tit cultural diffusion**  
 253 **experiment in Wytham Woods.** This analysis was designed to replicate the conditions  
 254 of the cultural diffusion experiment performed by Aplin et al. [11], in which two  
 255 alternative foraging techniques were introduced in the great tits population of Wytham  
 256 Woods in the United Kingdom, and their spread through time monitored. Each pixel in  
 257 the phase diagrams corresponds to a simulation run with the corresponding parameter  
 258 values, and the colour of the pixel indicates the emerging pattern after 150 days: grey =  
 259 mixture of solutions in every patch, blue = solution  $s_2$  dominates the whole system,  
 260 orange = solution  $s_1$  dominates the whole system, light green = weak local traditions,  
 261 light green = strong local traditions. The two top phase diagrams (with intermediate and  
 262 fast learning rates) correspond to model runs in which the distance separating patches  
 263 is the Euclidean distance (direct distance), while the phase diagram at the bottom  
 264 corresponds to model runs using the shortest route through the forest separating pairs  
 265 of patches (forest distance). Three examples of the evolution of the prevalence of  
 266 solution  $s_1$  among solvers are shown for fixed movement rate ( $m = 0.03$ ), learning rate  
 267 ( $\alpha = 0.005$ ) but with varying conformity strength. The maps represent the extent of  
 268 Wytham Woods and the location of the 60 feeders. Each feeder is represented by a pie  
 269 chart indicating the number of naïve individuals (grey), solvers using solution  $s_1$   
 270 (orange) and solvers using solution  $s_2$  (blue), and the size of the pie chart is proportional  
 271 to the total number individuals occurring around the feeder. When no conformity bias is  
 272 included ( $\lambda = 1$ ) it results in a mixture of solutions in every patch; when conformity is  
 273 relatively weak ( $\lambda = 1.3$ ) solution  $s_1$  ends up dominating in every patch; and when  
 274 conformity is relatively strong ( $\lambda = 4.5$ ) local traditions emerged.

275 The emergence of patterns depended on precisely where innovators with preferences  
276 for solutions  $s_1$  and  $s_2$  occurred, particularly when conformity was weak relative to the  
277 magnitude of the movement rate (Fig 4). When this was the case (i.e.  $\lambda = 1.2$  and  
278  $m = 0.02$ ), 62% of simulations in which initial conditions were randomised resulted in  
279 the emergence of local traditions, and the rest of the simulations resulted in one  
280 behavioural preference dominating the whole system (with half of those simulations  
281 leading to solution  $s_1$  to be predominant, and the other half of simulation with solution  
282  $s_2$  dominating). Which behavioural preference ended up dominating was strongly  
283 affected by the sizes of the pools of naïve individuals in contact with innovators  
284 preferring each solution at the start of the simulation. If one behavioural preference  
285 came to dominate the whole system, then it was likely to be the preference that was  
286 initially added in the comparatively larger sub-population (Fig 4), consistent with  
287 previous results. However, when conformity was strong relative to the magnitude of  
288 movement rate (i.e.  $\lambda = 4$  and  $m = 0.02$ ), all the simulations resulted in the emergence  
289 of local traditions. When no conformity was included (i.e.  $\lambda = 1$  and  $m = 0.02$ ), 79% of  
290 simulations resulted in a mixture of behavioural preferences in every sub-population,  
291 and the rest of simulations resulted in one behavioural preference dominating the whole  
292 system (with half of simulations leading to solution  $s_1$  throughout the landscape, and the  
293 other half of simulations with solution  $s_2$  predominant). Once again, the sizes of the  
294 pools of naïve individuals in contact with each innovator at the start of the simulation  
295 affected which pattern emerged, similarly to when a weak conformity was included (Fig  
296 4).



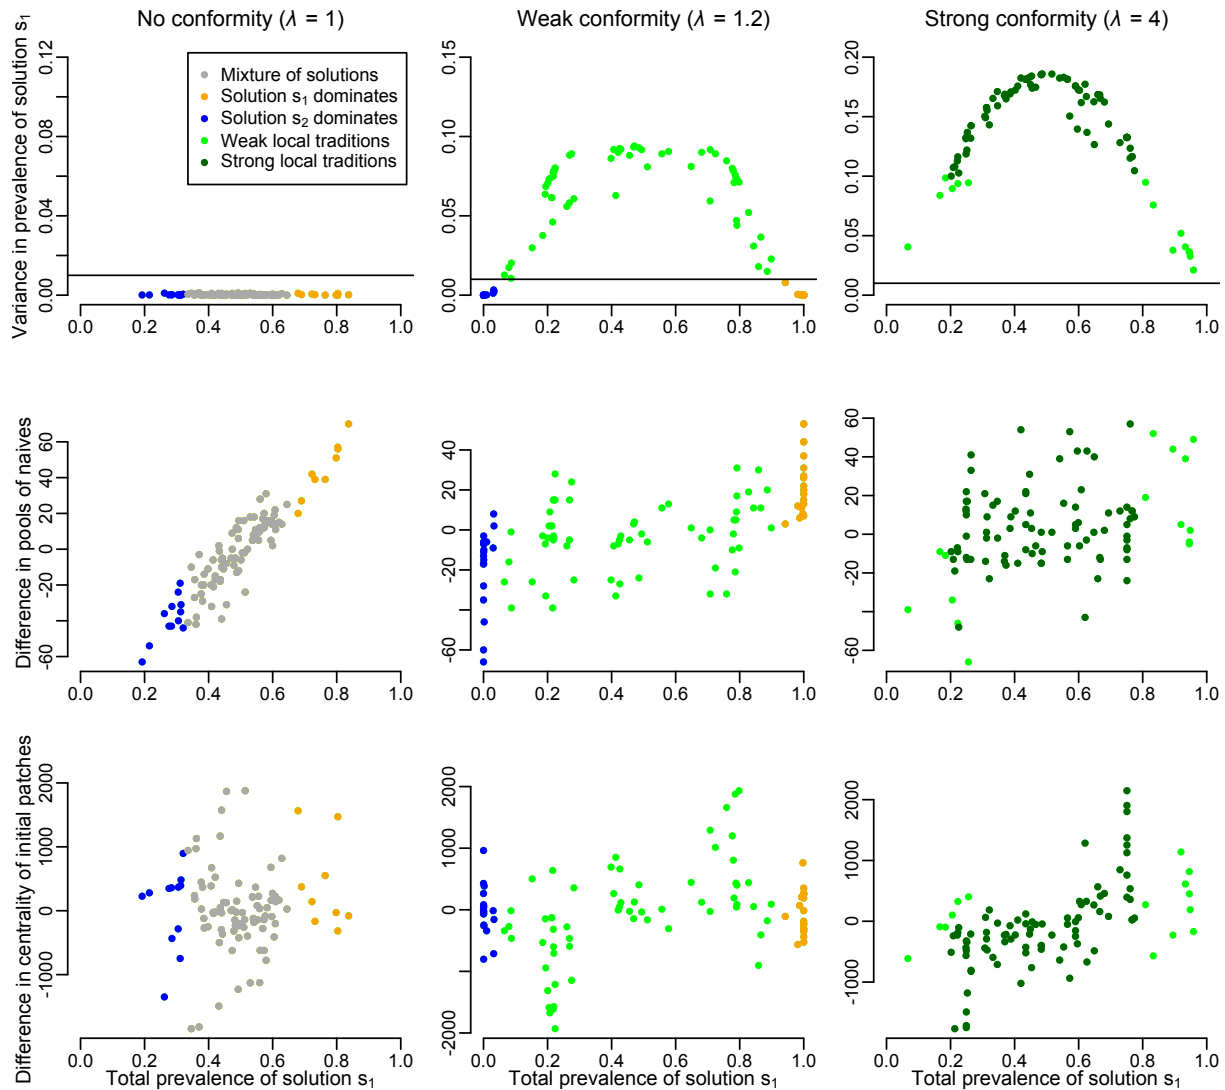

297

298 **Fig 4. The outcome of the spread of information is sensitive to the initial**  
 299 **conditions.** This panel shows results for the randomisation of initial conditions for the  
 300 spread of information in Wytham Woods. Each column of plots corresponds to a  
 301 different conformity strength, for which 100 simulations with randomised initial  
 302 conditions were run. The first row of plots indicates the values of simulations for the  
 303 two summary statistics used to identify the emerging pattern. The horizontal line  
 304 indicates the threshold above which local traditions were said to have emerged. The  
 305 second row of plots investigates a relationship between the total prevalence of solution  
 306  $s_1$  (one of the two summary statistics) and the difference between the pool of naïve  
 307 individuals initially in contact with solution  $s_1$  and  $s_2$  (i.e. size of the sub-population in  
 308 which innovators with solution  $s_1$  were released at the start of the simulation minus the  
 309 size of the sub-population in which innovators with solution  $s_2$  were released). The third  
 310 row of plots investigates a relationship between the total prevalence of solution  $s_1$  and  
 311 the difference in the centrality of the sub-populations in which innovators with solutions  
 312  $s_1$  and  $s_2$  were released at the start of the simulation. The centrality of a sub-population  
 313 was computed as the median distance between itself and other sub-populations (the  
 314 smaller the value the more central is the sub-population). The smaller the difference in

315 centrality, the more solution  $s_1$  was released in a central location compared to solution  
316  $s_2$ .  
317

## 318 **DISCUSSION**

319 Our results demonstrate the importance of the relationship between movement and  
320 conformity for determining whether or not local traditions establish in animal  
321 populations. First, our model indicates that a conformist bias in learning is key for the  
322 emergence of local traditions, as none of our simulations in which a conformist bias was  
323 not included led to the generation of local traditions (Figs 1–4; except in the two-patch  
324 case when the difference in size between the two sub-populations is very large and the  
325 learning rate is relatively fast, Fig S1). The importance of conformity in this scenario is in  
326 line with previous hypotheses and indications from experimental results [11,12,16,18].  
327 Second, we extended this finding to show that local traditions establish only when  
328 conformity is relatively strong compared to the magnitude of the movement rate of  
329 individuals between sub-populations. This was observed for the baseline model (two  
330 patches; Fig 1) and its extension to three patches (Fig 2) as well as for the realistic  
331 environmental setting of Wytham Woods (Fig 3). As highlighted for the baseline model,  
332 when conformity was weak relative to the magnitude of the movement rate, moving  
333 individuals could continuously invade a patch with alternative behavioural preferences  
334 at a faster rate than which they could conform to the local behavioural preference in that  
335 patch, thereby leading to the domination of a single behavioural preference across the  
336 whole system by the end of the simulation (e.g. Figs 1–3). Since neither of the two  
337 alternative behavioural preferences had a selective advantage, the solution that ended  
338 up dominating was determined by the initial conditions: a given behavioural preference  
339 that started in a larger pool of naïve individuals was more likely to dominate (Figs 1, 2  
340 and 4). This is because it spread more quickly at the start of the simulation than the  
341 alternative preference, and knowledgeable individuals moving out of that sub-  
342 population therefore represented a relatively large proportion of knowledgeable  
343 individuals in each sub-population that they arrived in.

344 Importantly, the spatial configuration of patches also influences the outcome of the  
345 spread of information. Increasing habitat fragmentation led to more favourable  
346 conditions for the establishment of local traditions by lowering the movement rate and  
347 thus increasing the relative impact of conformist learning. This was observed for both

348 the three-patches setting (Fig 2) and in the realistic setting of Wytham Woods (Fig 3;  
349 when we used *forest distance*, the fragmentation of the habitat was effectively larger  
350 than when we used *Euclidean distance*). The spatial configuration of patches also affects  
351 which of the two alternative behavioural preferences ultimately dominates when  
352 conformity is weak relative to the magnitude of the movement rate. In the three-patch  
353 setting, the behavioural preference that colonised the third patch first (in which no  
354 innovators were introduced) was generally the one that ended up dominating at the end.  
355 This effect was determined by how far the patches were from each other and the relative  
356 sizes of the sub-populations. Interestingly, if the sub-population with the largest pool of  
357 naïve individuals at the start of the simulation was also more distant from the other sub-  
358 populations, which preference predominated at the end depended on the interplay  
359 between conformity strength and the magnitude of movement rate (Fig 2 second row of  
360 phase diagrams), as this affected which preference was better at colonising the patch  
361 with no innovator.

362 Finally, a surprising effect of space was observed in a three-patch landscape in which  
363 innovators were initially introduced in two large patches but where one of the two large  
364 patches was located slightly further away from the other two patches. In this case, the  
365 behavioural preference of the innovator in the most distant patch ended up dominating  
366 the whole system when conformity was very weak relative to the magnitude of the  
367 movement rate (Fig S2, second plot of fourth row, in blue). A possible explanation for  
368 this result is that, with a very high movement rate relative to conformity strength, naïve  
369 individuals from the patch without innovators moved *en masse* and slowed down the  
370 initial spread of the behavioural preferences. This effect was less pronounced for the  
371 preference introduced in the most distant patch (as movement was dependent on  
372 distance) and so this preference could subsequently colonise the patch without  
373 innovators faster than the alternative preference. Overall, these results highlight the  
374 important effects of habitat configuration and fragmentation on the spread of culture in  
375 animal populations (see also [19]), and allow for testable predictions to be made. It is  
376 particularly relevant given the wide range of animal populations around the world that  
377 are affected by habitat fragmentation [20,21].

378 Our model replicated the diffusion curves empirically observed in a cultural diffusion  
379 experiment in great tits in Wytham Woods [11]. With the same initial conditions in our

380 model as in the field experiment (i.e. trained innovators released at the same locations  
381 in the landscape) and for an intermediate learning rate, the model predicted that sub-  
382 populations in which trained individuals were released should have reached a  
383 proportion of solvers approximately between 0.6–0.8 after 20 days (Fig S3; with one  
384 exception with a proportion of solvers of 0.35), and sub-populations in which no trained  
385 innovators were released to contain a proportion of solvers between 0.1–0.4 after 20  
386 days (Fig S3). These values are very similar to the empirical results reported in the  
387 original study (Fig 1b in [11]). This supports the potential for this model to be used to  
388 make predictions about when novel behaviours could result in local traditions. These  
389 predictions could in turn be tested in cultural diffusion experiments.

390 Our model predicts that local traditions establish when the movement rate of  
391 individuals between sub-populations is low relative to the strength of conformity, based  
392 on a given learning rate. If movement rates are relatively high, the location where the  
393 different behaviours emerge has an important effect on the outcome. The model predicts  
394 that the centrality of location in the landscape largely does not affect the outcome but  
395 that the size of the pool of naïve individuals living there has a strong effect (Fig 4). If a  
396 conformist bias exists in the transmission of information, and for a given movement  
397 ability of the population, local traditions are more likely to establish and be well  
398 pronounced if two different behavioural preferences appear in sub-populations with  
399 similar sizes (Fig 4). These predictions have many implications for studying the  
400 emergence of behavioural traditions in animal populations in which social learning  
401 occurs. They highlight the key and often neglected role of movement, and particularly its  
402 interplay with conformist learning, as well as the importance of the initial conditions. It  
403 should therefore be interesting going forwards to test these model predictions for  
404 species with different levels of mobility – e.g. high mobility of fission-fusion bird  
405 populations [22] versus low inter-group movement rates by vervet monkeys [12] – and  
406 for various initial conditions.

407 In this study, we modelled a scenario in which two alternative behavioural preferences  
408 are introduced at the same time into a population of naïve individuals. This is consistent  
409 with cultural diffusion experiments. However, in natural settings, it is also likely that  
410 solutions to a foraging task might be discovered and rediscovered through repeated  
411 innovations [17]. Incorporating an asocial learning rate, whereby individuals can

412 spontaneously learn to solve the puzzle using a certain solution, would be an interesting,  
413 and relatively straightforward, addition to our model. However, it should have very little  
414 impact unless it is large relative to the social learning rate, or if individuals do not  
415 abandon personal preferences to conform. Future research could also extend our model  
416 to reflect other characteristics. For example, including demographic processes could be  
417 a fruitful avenue for making long-term predictions. We assumed that the total carrying  
418 capacity of the environment had been reached and that each sub-population had a  
419 constant number of individuals. However, including varying population sizes could be  
420 interesting for exploring whether or not local traditions remain stable across multiple  
421 generations. Furthermore, the model may also be useful for considering how individual-  
422 level differences interact with the emergence and spread of culture. For example,  
423 juveniles could potentially learn faster than adults, or conformity could vary across age  
424 classes [18]. Individual-level differences have recently been highlighted as being  
425 important in shaping the dynamics of collective behaviour in animal groups [23,24]. It is  
426 therefore likely that such differences could play a major role in shaping the spread of  
427 behaviours and the establishment of local traditions in natural populations. It would  
428 also be interesting to consider a stochastic version of our model, since random events  
429 soon after traditions arrive in a naïve population are likely to play an important role in  
430 determining the tradition that ends up dominating.

431 In summary, our results provide new insights into the interplay between the movement  
432 of individuals and conformist learning in the emergence of animal culture. By simply  
433 incorporating these two processes, our model is able to make predictions about the  
434 emergence and stability of local traditions, and allow the influence of quantities such as  
435 initial population conditions and the degree of habitat fragmentation to be tested. A  
436 major strength of the model is its generalisability. Future research could extend the  
437 model to explore the spread of animal culture for more than two behavioural  
438 preferences, other environmental settings and different time scales, and integrating  
439 individual differences and non-static sub-population demographics. Such exploration of  
440 the spread of socially-transmitted information in animal populations has the potential to  
441 provide additional insights into the conditions under which local traditions emerge and  
442 persist.

443

444

## 445 MATERIALS AND METHODS

446 **The baseline model:** The spatially-explicit model describing the spread of animal  
447 culture integrates two processes: (1) transmission of information between individuals  
448 with a conformity bias, and (2) movement of individuals between spatially distinct  
449 patches of habitat. A novel behaviour, which consists of two equally difficult, and equally  
450 rewarding, solutions to a novel foraging resource ( $s_1$  and  $s_2$ ) is introduced into a  
451 population of naïve individuals (who are unable to solve the task at the time of  
452 introduction) by adding innovators, which are individuals who know how to solve the  
453 task with a preference for either solution  $s_1$  or  $s_2$ . The information about how to solve  
454 the novel task, along with the preference for either one of the two alternative solutions,  
455 can be socially transmitted to other individuals. The spread of the two behavioural  
456 preferences in the population is then modelled, with simulations being run for 150 days  
457 (with a daily time step). At any time, an individual is either naïve, a solver  $s_1$ , or a solver  
458  $s_2$ . During encounters with other individuals, naïve individuals can learn from solvers,  
459 and in doing so copy their behavioural preference, with parameter  $\alpha$  governing the  
460 magnitude of the learning rate. The rate at which naïve individuals acquire one of the  
461 two alternative solutions ( $s_1$  and  $s_2$ ) is a function of the proportion of solvers with this  
462 behavioural preference among all the solvers in the local sub-population. When  
463 individuals have a conformity bias (i.e. they are more likely to copy a specific  
464 behavioural preference than the prevalence of this preference among local solvers),  
465 which is given by the conformity parameter  $\lambda$ , then individuals use information about  
466 the behaviour of all other individuals in the patch when choosing which preference to  
467 acquire. The conformity parameter  $\lambda$  determines the strength of sigmoidality (i.e. S-  
468 shapedness) of the acquisition curve. An acquisition curve is the relationship between  
469 the prevalence of a preference for a solution in the local sub-population and the  
470 probability of adopting that preference (see equations below describing the conformist  
471 learning function  $L$  for learning  $s_1$  and  $s_2$ ). In this model, conformist learning (from naïve  
472 to solver) and conformist switching (from solving the puzzle using one solution to using  
473 the alternative solution) were modelled in the same way using the same parameters. By  
474 doing this, the likelihood of an individual learning from another is approximately  
475 independent of whether or not the individual already has a preference for either  
476 solution to the puzzle.

477 In the initial baseline version of the model, the environment is assumed to consist of two  
478 patches, with each one hosting a sub-population. Within each sub-population, we  
479 assume individuals mix entirely at random. The size of each sub-population is at  
480 equilibrium throughout the simulation (i.e. no variation during the 150 days),  
481 essentially assuming that each sub-population size is at the strict carrying capacity of  
482 each patch. The movement rate of individuals between the patches decreases  
483 exponentially with the distance  $d$  separating them, with a parameter  $m$  determining the  
484 magnitude of the movement rate between the patches. In each patch  $j$  (where  $j = 1$  or  $j =$   
485  $2$ ), the change of the numbers of individuals that are naïve ( $U^{(j)}$ ), solvers with a  
486 preference for solution  $s_1$  ( $S_1^{(j)}$ ) and solvers with a preference for solution  $s_2$  ( $S_2^{(j)}$ )  
487 through time is modelled using a system of differential equations. For example, the  
488 change in the composition of individuals in patch  $j = 1$  is given by:

$$489 \left\{ \begin{array}{l} \frac{dU^{(1)}}{dt} = -\alpha(S_1^{(1)} + S_2^{(1)})U^{(1)} - \frac{m(U^{(2)} + S_1^{(2)} + S_2^{(2)})U^{(1)}}{d} + \frac{m(U^{(1)} + S_1^{(1)} + S_2^{(1)})U^{(2)}}{d} \\ \frac{dS_1^{(1)}}{dt} = L_{S_1}^{(1)}\alpha(S_1^{(1)} + S_2^{(1)})U^{(1)} - L_{S_2}^{(1)}\alpha(S_1^{(1)} + S_2^{(1)})S_1^{(1)} + L_{S_1}^{(1)}\alpha(S_1^{(1)} + S_2^{(1)})S_2^{(1)} - \frac{m(U^{(2)} + S_1^{(2)} + S_2^{(2)})S_1^{(1)}}{d} + \frac{m(U^{(1)} + S_1^{(1)} + S_2^{(1)})S_1^{(2)}}{d} \\ \frac{dS_2^{(1)}}{dt} = L_{S_2}^{(1)}\alpha(S_1^{(1)} + S_2^{(1)})U^{(1)} - L_{S_1}^{(1)}\alpha(S_1^{(1)} + S_2^{(1)})S_2^{(1)} + L_{S_2}^{(1)}\alpha(S_1^{(1)} + S_2^{(1)})S_1^{(1)} - \frac{m(U^{(2)} + S_1^{(2)} + S_2^{(2)})S_2^{(1)}}{d} + \frac{m(U^{(1)} + S_1^{(1)} + S_2^{(1)})S_2^{(2)}}{d} \end{array} \right.$$

490  
491 The equations for  $j = 2$  are similar. In the equations above, the parameters  $L_{S_1}^{(1)}$  and  $L_{S_2}^{(1)}$   
492 correspond to the conformist learning functions for learning solutions  $s_1$  and  $s_2$   
493 respectively, which are functions of the prevalence of solution  $s_1$  in the sub-population  
494 ( $P^{(1)}$ ; i.e. proportion of individuals in state  $s_1$  among solvers in patch 1) and are defined  
495 as follows:

$$L_{S_1}^{(1)} = \frac{\left(\frac{P^{(1)}}{1 - P^{(1)}}\right)^\lambda}{1 + \left(\frac{P^{(1)}}{1 - P^{(1)}}\right)^\lambda}$$

496

$$L_{S_2}^{(1)} = 1 - L_{S_1}^{(1)}$$

497 These conformist learning functions produce a sigmoidal relationship between a  
498 solution's prevalence in the sub-population and the probability of adoption of that  
499 behavioural preference (called acquisition curve; [25,26]; Fig S4). If  $\lambda = 1$ , there is no  
500 conformity bias included in the model (i.e. straight 1:1 line; see Fig S4).



501 At the start of each simulation, two innovators (i.e. knowledgeable individuals) with  
502 solution  $s_1$  were added to one patch and two innovators with solution  $s_2$  were added to  
503 the other patch. We ran simulations for various conformity strengths:  $\lambda \in [1, 5]$  sampled  
504 every 0.1; and movement rate magnitudes:  $m \in [0.0005, 0.01]$  sampled every 0.0005. To  
505 investigate if results were affected by how quickly individuals learn, we ran the  
506 simulations for different learning rate:  $\alpha = 0.001$  (slow learning rate),  $\alpha = 0.005$   
507 (intermediate learning rate) and  $\alpha = 0.01$  (fast learning rate). As there are only two  
508 patches here, changing the distance between the patches is equivalent to changing the  
509 movement rate  $m$  (see equations above), so we therefore set  $d = 1$  for every simulation  
510 run. To investigate the effect of patch size, we also ran simulations with different  
511 numbers of naïve individuals in each patch at the start of the simulation (see Figs 1 and  
512 S1).

513

514 **Simple environmental setting:** We extended the baseline model to three patches, each  
515 containing a sub-population. In this case, the equations described above for the baseline  
516 model were adapted for environmental settings with more than two patches (see  
517 Supporting Methods). At the start of each simulation, two innovators with solution  $s_1$   
518 were added to one patch and two innovators with solution  $s_2$  were added to another  
519 patch (the third patch was assumed to initially consist of only naïve individuals). We ran  
520 simulations for the same ranges of values of conformity strength ( $\lambda$ ) and movement rate  
521 ( $m$ ) as for the baseline model. The learning rate was kept at the fast level ( $\alpha = 0.01$ ) for  
522 every simulation so that emerging patterns were more pronounced within the range of  
523 values explored for  $\lambda$  and  $m$ . We also investigated the effect of patch size by running  
524 simulations with the different numbers of naïve individuals in each patch at the start of  
525 the simulation (see Figs 2 and S2). To investigate the effect of habitat fragmentation, we  
526 varied the distance between the patch where two individuals trained to solve the puzzle  
527 with solution  $s_2$  were added and the two other patches, investigating distances 1, 1.5 and  
528 5, while the distance separating the two other patches was maintained at 1 (see  
529 schematics in Fig 2).

530

531 **Realistic environmental setting:** Wytham Woods, Oxfordshire, UK (51° 46' N, 01° 20'  
532 W) is a 385ha broadleaf deciduous woodland surrounded by open farmland and covered  
533 by an evenly-spaced grid of 60 feeders (see the map in Fig S5). This is the location where

534 Aplin et al. [11] performed the cultural diffusion experiment in great tits, introducing  
535 alternative novel foraging techniques and monitoring their spread. We extended the  
536 baseline model to this realistic setting, and used the adapted equations for more than  
537 two patches (see Supporting Methods). We started simulations with the same initial  
538 conditions as in the field study, releasing two innovators at targeted patches in a similar  
539 fashion (i.e. at the same feeders; see Fig S5). We divided the landscape so that each patch  
540 in our model contained one feeder. The total number of individuals across the woods  
541 and relative patch size (i.e. the number of individuals in each patch around each feeder  
542 in each time step) were derived from data described in [13]. We ran simulations for the  
543 same ranges of values for conformity strength as described for the baseline model. We  
544 investigated the following range of values for the movement rate:  $m \in [0.005, 0.1]$ . This  
545 was different from the range of values explored for the two-patch and three-patch cases  
546 for this parameter because the distances separating patches were in meters here rather  
547 than in arbitrary spatial units. We modified the environment and the initial conditions to  
548 investigate how these changes affected the model outcomes. First, we used two distance  
549 measures between pairs of patches: *direct Euclidean distance* and *forest distance*, the  
550 latter being computed as the length of the shortest route between the two patches  
551 through the forest (without crossing open ground). This is known to be an ecologically  
552 relevant measure of distance with regard to movement within this population [13].  
553 Second, we randomised the locations of feeders where trained individuals were released  
554 at the start of simulations. For three different values of conformity strength  $\lambda = 1$  (no  
555 conformity included),  $\lambda = 1.2$  (weak conformity) and  $\lambda = 4$  (strong conformity), and a  
556 fixed movement rate magnitude ( $m = 0.02$ ), we ran 100 simulations, each with a  
557 random location (i.e. sub-population/patch) where two innovators with solution  $s_1$ , and  
558 another random location where two innovators with solution  $s_2$ , were added at the start.

559

560 **Analysing emerging patterns:** In all model runs for every environmental setting (two  
561 patches, three patches and Wytham Woods), we reported the total prevalence of  
562 solution  $s_1$  across the whole population at the end of the simulation ( $P_{tot}$ ; i.e. proportion  
563 of individuals with behavioural preference for solution  $s_1$  among all solvers in all  
564 patches) and the spatial variance of the final prevalence of solution  $s_1$  in sub-populations  
565 ( $P_{var}$ ; i.e. variance in the proportion of individuals with behavioural preference for

566 solution  $s_1$  among local solvers in each patch). These two summary statistics were used  
567 to identify the emerging patterns:

- 568 - if  $P_{var} > 0.1$ : *strong local traditions* established at the end of the simulation (i.e.  
569 some sub-populations are strongly dominated by one behavioural preference  
570 while the others are strongly dominated by the alternative preference)
- 571 - if  $0.1 > P_{var} > 0.01$ : *weak local traditions* established at the end of the simulation  
572 (i.e. some sub-populations have a bit more of one behavioural preference while  
573 the others have a bit more of the alternative preference)
- 574 - if  $P_{var} < 0.01$  and  $P_{tot} > 0.66$ : *solution  $s_1$  dominated* across the whole system at the  
575 end of the simulation
- 576 - if  $P_{var} < 0.01$  and  $P_{tot} < 0.33$ : *solution  $s_2$  dominated* across the whole system at the  
577 end of the simulation
- 578 - if  $P_{var} < 0.01$  and  $0.33 > P_{tot} > 0.66$ : *mixture of solutions* in every sub-population

579 These criteria and thresholds were chosen in order to best reflect a visual identification  
580 of the emerging patterns (see examples in Fig 3).

581

## 582 REFERENCES

- 583 1. Dall SRX, Giraldeau L-A, Olsson O, McNamara JM, Stephens DW. Information and its  
584 use by animals in evolutionary ecology. *Trends in Ecology & Evolution*. 2005; 20(4):  
585 180–193.
- 586 2. Aoki K, Feldman MW. Evolution of learning strategies in temporally and spatially  
587 variable environments: a review of theory. *Theoretical Population Biology*. 2014;  
588 91: 3–19.
- 589 3. Jones TB, Aplin LM, Devost I, Morand-Ferron J. Individual and ecological  
590 determinants of social information transmission in the wild. *Animal Behaviour*.  
591 2017; 129: 93–101.
- 592 4. Laland KN. Social learning strategies. *Learning & Behavior*. 2004; 32: 4–14.
- 593 5. Rendell L, Fogarty L, Hoppitt WJE, Morgan TJH, Webster MM, Laland KN. Cognitive  
594 culture: theoretical and empirical insights into social learning strategies. *Trends in*  
595 *Cognitive Sciences*. 2011; 15: 68–76.
- 596 6. Warner RR. Traditionality of mating-site preferences in a coral reef fish. *Nature*.  
597 1988; 335: 719–721.
- 598 7. Rogers EM. *Diffusion of innovations*. New York: The Free Press; 1995.

- 599 8. Laland KN, Janik VM. The animal cultures debate. *Trends in Ecology & Evolution*.  
600 2006; 21: 542–547.
- 601 9. Whiten A, Mesoudi A. Establishing an experimental science of culture: animal social  
602 diffusion experiments. *Philosophical Transactions of the Royal Society of London B*.  
603 2008; 363: 3477–3488.
- 604 10. Whiten A, Hinde RA, Laland KN, Stringer CB. Culture evolves. *Philosophical*  
605 *Transactions of the Royal Society of London B*. 2011; 366: 938–948.
- 606 11. Aplin LM, Farine DR, Morand-Ferron J, Cockburn A, Thornton A, Sheldon BC.  
607 Experimentally induced innovations lead to persistent culture via conformity in wild  
608 birds. *Nature*. 2015; 518: 538–541.
- 609 12. Van de Waal E, Borgeaud C, Whiten A. Potent social learning and conformity shape a  
610 wild primate’s foraging decisions. *Science*. 2013; 340: 483–485.
- 611 13. Farine DR, Sheldon BC. Social ecology of a woodland songbird community: from  
612 individual movements to the emergence of population social structure. *BioRxiv*.  
613 2016; doi.org/10.1101/085944
- 614 14. Patterson TA, Thomas L, Wilcox C, Ovaskainen O, Matthiopoulos J. State-space  
615 models of individual animal movement. *Trends in Ecology & Evolution*. 2008; 23:  
616 87–94.
- 617 15. Henrich J, Boyd R. The evolution of conformist transmission and the emergence of  
618 between-group differences. *Evolution and Human Behavior*. 1998; 19: 215–241.
- 619 16. Boyd R, Richardson PJ. *Culture and the evolutionary process*. Chicago: University of  
620 Chicago Press; 1985.
- 621 17. Whiten A, Horner V, de Waal FBM. Conformity to cultural norms of tool use in  
622 chimpanzees. *Nature*. 2005; 437: 737–740.
- 623 18. Aplin LM, Sheldon BC, McElreath R. Conformity does not perpetuate suboptimal  
624 traditions in a wild population of songbirds. *PNAS*. 2017; 114: 7830–7837.
- 625 19. He P, Maldonado-Chaparro AA, Farine DR. The role of habitat configuration in  
626 shaping social structure: a gap in studies of animal social complexity. *Behavioural*  
627 *Ecology & Sociobiology*. In revision.
- 628 20. Wilson MC, Chen X, Corlett RT, Didham RK, Ding P, Holt RD, Holyoak M, Hu G,  
629 Hughes AC, Jiang L, Laurance WF, Liu J, Pimm SL, Robinson SK, Russo SE, Si X,  
630 Wilcove DS, Wu J, Yu M. Habitat fragmentation and biodiversity conservation: key  
631 findings and future challenges. *Landscape Ecology*. 2016; 31: 219–227.

- 632 21. Crooks KR, Brudett CL, Theobald DM, King SRB, Di Marco M, Rondinini C, Boitani L.  
633 Quantification of habitat fragmentation reveals extinction risk in terrestrial  
634 mammals. *PNAS*. 2017; 201705769.
- 635 22. Farine DR, Firth JA, Aplin LM, Crates RA, Culina A, Garroway CJ, Hinde CA, Kidd LR,  
636 Milligan ND, Psorakis I, Radersma R, Verhelst B, Voelkl B, Sheldon BC. The role of  
637 social and ecological processes in structuring animal populations: a case study from  
638 automated tracking of wild birds. *Royal Society Open Science*. 2015; 2: 150057.
- 639 23. Aplin LM, Farine DR, Mann RP, Sheldon BC. Individual-level personality influences  
640 social foraging and collective behaviour in wild birds. *Proceedings of the Royal  
641 Society B*. 2014; 218: 20141016.
- 642 24. Jolles JW, Boogert NJ, Sridhar VH, Couzin ID, Manica A. Consistent individual  
643 differences drives collective behaviour and group functioning of schooling fish.  
644 *Current Biology*. 2017; 27: 2862-2868.
- 645 25. Morgan TJH, Laland KN. The biological bases of conformity. *Frontiers in  
646 Neuroscience*. 2012; 6: 87.
- 647 26. Smaldino PE, Aplin LM, Farine DR. Do sigmoidal acquisition curves indicate  
648 conformity? *BioRxiv*. 2017; doi.org/10.1101/159038.
